# Supplementary material for: Multilevel Parallelization of AutoDock 4.2
Source: Springer Nature journal article supplement (doi:10.1186/1758-2946-3-12), 2011-04-28

**A**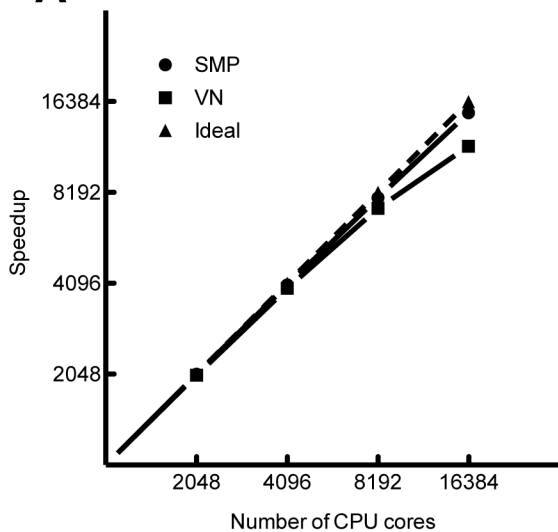**B**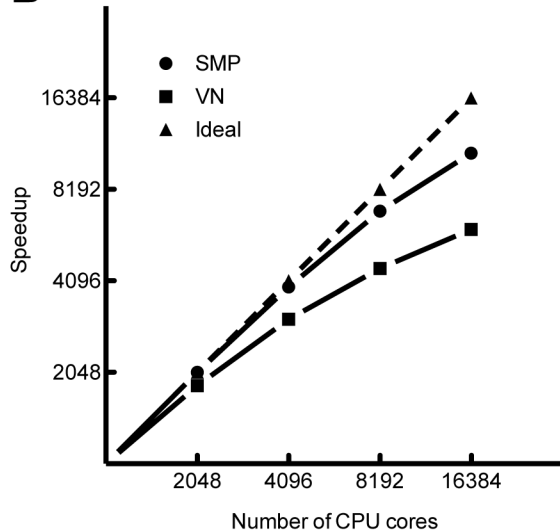**C**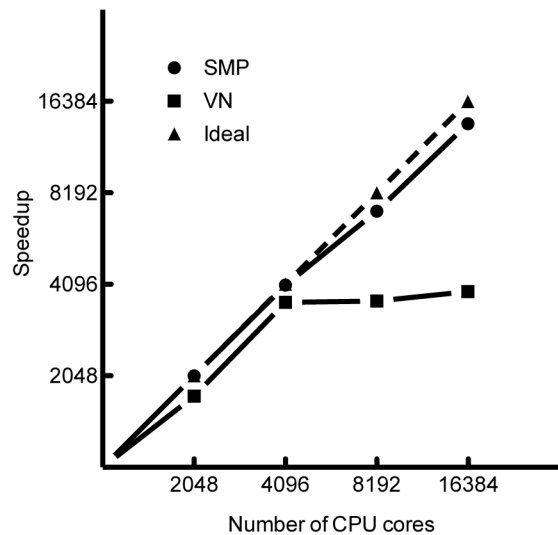**D**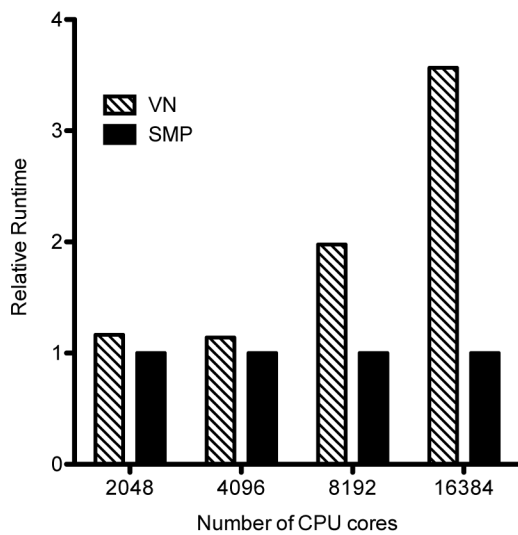

Supplement: 13321_2011_195_MOESM3_ESM.pdf [file 13321_2011_195_MOESM3_ESM.pdf]
